# Supplementary material for: Exploring the Conformational Transitions of Biomolecular Systems Using a Simple Two-State Anisotropic Network Model
Source: PubMed Central journal article supplement (PMC3974643; doi:10.1371/journal.pcbi.1003521), 2014-04-03
Supplement: pcbi.1003521.s001.pdf [file pcbi.1003521.s001.pdf]

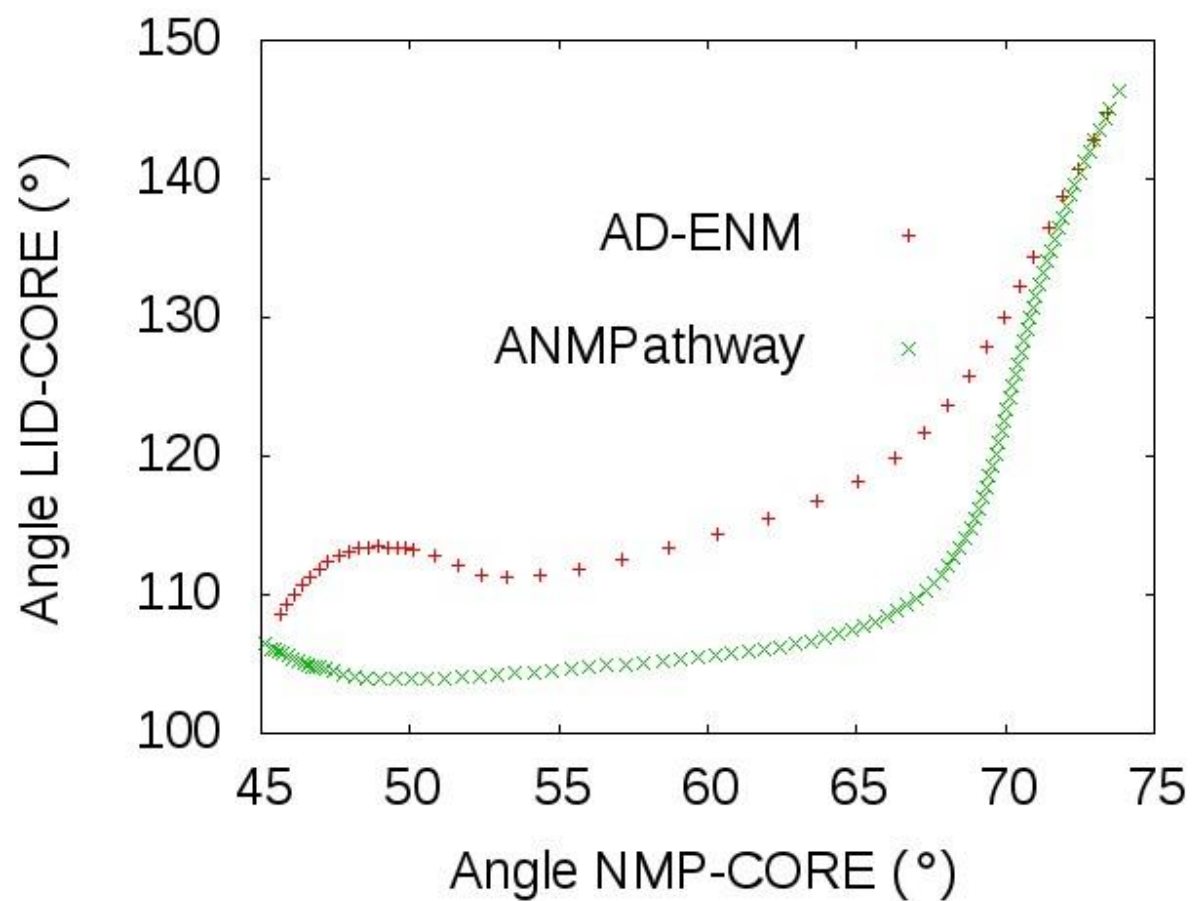

**Figure S1. Comparison of *AD-ENM* and *ANMPPathway* paths of AK.** Projections of pathways on the space spanned by LID-CORE and NMP-CORE angles. See caption of Figure 2 in the main manuscript for angle definitions.
