# Supplementary material for: Exploring the Conformational Transitions of Biomolecular Systems Using a Simple Two-State Anisotropic Network Model
Source: PubMed Central journal article supplement (PMC3974643; doi:10.1371/journal.pcbi.1003521), 2014-04-03
Supplement: pcbi.1003521.s003.pdf [file pcbi.1003521.s003.pdf]

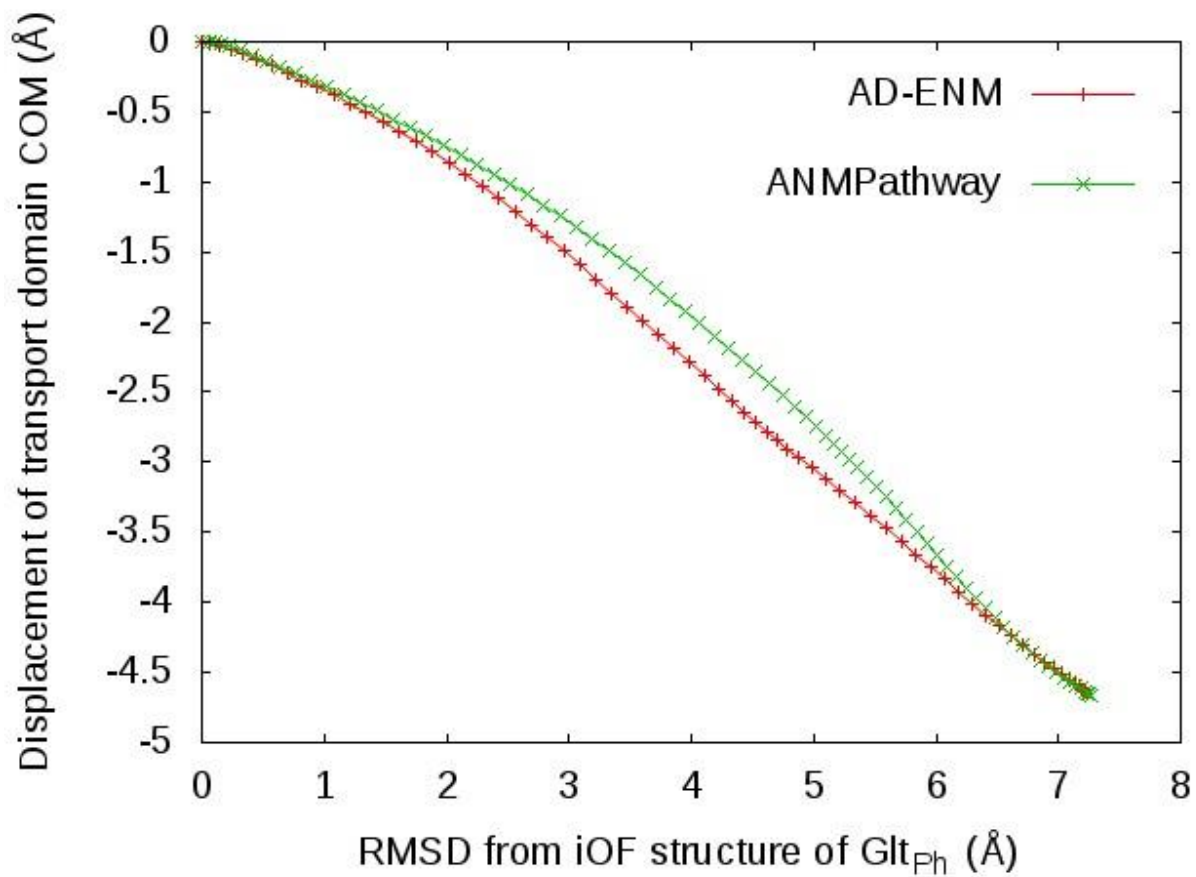

**Figure S3. Comparison of *AD-ENM* and *ANMPathway* paths of Glt<sub>ph</sub>.** Projections of pathways on a space spanned by two order parameters, RMSD from the end point (iOF state) and the *z* component of the displacement of the center of mass (COM) of the transport domain (based on C<sup>α</sup> atoms) with respect to the initial crystal structure.
